# Supplementary material
Source: PubMed Central journal article supplement (PMC3347082)
Supplement: supp_194.9.2228_TableS1-S3.pdf [file supp_194.9.2228_TableS1-S3.pdf]

**TABLE S1****Primers used for RT-PCR, PCR and for primer extension**

| <b>primer</b>      | <b>sequence</b>                    | <b>size of PCR product</b> |
|--------------------|------------------------------------|----------------------------|
| rps1               | 5'-CAA GCACGACCACCACTCCC-3'        |                            |
| +16R               | 5'-TTCGGCGTAGTGGGTCTCGT-3'         | 460 bp                     |
| ramR F1            | 5'-GAGATGGTTCGT ATTGCCGT-3'        |                            |
| ramR R1            | 5'-GCA CGATGCGGATCGCGTCGA-3'       | 583 bp                     |
| SCPMPF3            | 5'-TGGCCCCCGGGGGCAGATCCC-3'        |                            |
| pnpB1              | 5'-CTCGTCGCGGGATCCGACGTG-3'        | 2560 bp                    |
| SCO3982F1          | 5'- GTG-CCC-GCT-TCG-CGA-GTG-AGC-3' |                            |
| SCO3982R1          | 5'-TCA-GCT-CTC-CCT-GCC-CTC-GAC-3'  | 2449 bp                    |
| SCINTLF1 (SC05737) | 5'-GCCGAGGGCCTCGGACACCTG-3'        |                            |
| 3987R2 (SCO3987)   | 5'-GGATTTGTCATCCGTGCAACA-3'        |                            |
| 3988R1 (SCO3988)   | 5'-TCA GCTCTCCCTGCCCTCGAC-3'       |                            |

Table S2 - RNA-seq RESULTS BY GENE TYPE

Listings in **red** represent genes whose transcripts increased by  $\geq$  two-fold in *S. coelicolor* JSE1880 as compared to M145. Listings in black represent genes whose transcripts decreased by  $\geq$  two-fold in JSE1880. Listings in **blue** indicate transcripts that were present in the BARD. Ribosomal RNA genes are listed in black even though some of the transcripts from those genes changed by less than two-fold in JSE1880.

#### **PUTATIVE REGULATORY PROTEINS**

[SCO0168](#) (2.41) - possible regulator protein  
[SCO0772](#) (2.46) - putative regulatory protein  
SCO3217 (-2.18) – CdaR, putative transcriptional regulator  
[SCO3982](#) (2.31) – weak similarity to ROK family of transcriptional regulators, *S. clavuligerus*  
[SCO3983](#) (2.14) – weak similarity to putative transcriptional regulator, *Nocardia farcinica*  
[SCO3984](#) (2.23) – putative transmembrane protein  
[SCO3985](#) (2.61) – GntR regulator family (?), conserved in other streptomycetes  
[SCO3986](#) (2.20) - putative GntR-family transcriptional regulator  
[SCO4229](#) (2.15) - putative sensor kinase (*phoR*)  
[SCO5190](#) (3.92) - putative DNA-binding protein  
[SCO5338](#) (2.67) - putative regulatory protein  
[SCO5341](#) (3.70) - SpdA2 protein  
[SCO5342](#) (3.51) - SpdB2 protein  
SCO5344 (4.16) - SpdD2 protein  
[SCO5607](#) (2.43) - putative transcriptional regulator  
SCO6280 (-2.00) – KasO, possible regulatory protein  
[SCO6823](#) (2.31) - putative ArsR-family transcriptional regulator

#### **ABC TRANSPORTERS**

[SCO1558](#) (2.08) - putative ABC transporter permease protein  
SCO3223 (-13.76) - putative ABC transporter integral membrane protein  
SCO3224 (-9.71) – putative ABC transporter ATP-binding protein  
[SCO4140](#) (2.39) - phosphate ABC transport system permease protein  
[SCO4141](#) (3.14) - phosphate ABC transport system permease protein  
[SCO5112](#) (2.56) - BldKA, putative ABC transport system integral membrane protein  
[SCO5113](#) (2.21) - BldKB, putative ABC transport system lipoprotein  
[SCO5114](#) (2.22) - BldKC, putative ABC transport system integral membrane protein  
[SCO5479](#) (2.14) - oligopeptide ABC transporter ATP-binding protein

#### **NITROGEN AND PHOSPHORUS METABOLISM**

[SCO0209](#) (2.01) - urease  $\beta$  subunit  
[SCO0216](#) (2.45) - nitrate reductase alpha chain NarG2  
[SCO0217](#) (2.02) - probable nitrate reductase beta chain  
[SCO0218](#) (2.41) - putative nitrate reductase delta chain NarJ2  
[SCO0219](#) (2.18) - putative nitrate reductase delta chain NarI2  
[SCO1234](#), [5526](#) (2.23) - urease  $\alpha$  subunit  
[SCO2198](#) (2.09) - glutamine synthetase I  
[SCO4142](#) (3.59) – phosphate binding protein precursor

[SCO4145](#) (2.34) – polyphosphate kinase  
[SCO4947](#) (3.23) - nitrate reductase alpha chain NarG3  
[SCO4948](#) (3.77) - nitrate reductase beta chain NarH3  
[SCO4949](#) (3.37) - nitrate reductase delta chain NarJ3  
[SCO4950](#) (2.54) - nitrate reductase gamma chain NarI3

### **CARBOHYDRATE METABOLISM**

[SCO0199](#) (2.70) - putative alcohol dehydrogenase  
[SCO0773](#) (2.63) - putative ferredoxin  
[SCO4283](#) (2.06) - probable sugar kinase  
[SCO4857](#), 4858, 5106, 5107 (3.16) - putative succinate dehydrogenase membrane subunit  
[SCO4875](#) (2.13) - putative sugar transferase  
[SCO4878](#) (2.00) - possible glycosyltransferase  
[SCO4880](#) (3.91) - possible transferase  
[SCO4881](#) (3.99) – putative polysaccharide biosynthesis related protein  
[SCO5578](#) (2.40) - putative sugar transporter  
[SCO7511](#) (2.37) - glyceraldehyde 3-phosphate dehydrogenase

### **ATP-GTP BINDING PROTEINS**

SCO1627 (-2.63)  
SCO6797 (-2.06)

### **CYTOCHROMES**

SCO1626 (-2.60) - putative cytochrome P450  
[SCO0774](#) (3.87) - putative cytochrome P450  
[SCO0924](#) (2.61) - putative cytochrome B subunit

### **MEMBRANE ATPases**

SCO3216 (-4.81)

### **OTHER MEMBRANE PROTEINS**

[SCO0201](#) (2.78) - putative integral membrane protein  
[SCO0863](#) (2.21) - putative integral membrane protein  
SCO1630 (-2.26) - putative integral membrane protein, possible histidine sensor kinase  
[SCO1700](#) (2.11) - putative membrane protein  
[SCO1710](#) (2.08) - putative integral membrane transport protein  
[SCO2197](#) (2.47) - putative integral membrane protein  
SCO4225 (2.04) - possible integral membrane protein  
[SCO4843](#) (2.20) - putative integral membrane protein  
[SCO5476](#) (3.11) - oligopeptide transport integral membrane protein  
[SCO5477](#) (2.18) - putative oligopeptide-binding lipoprotein  
[SCO5478](#) (2.54) - oligopeptide transport system integral membrane protein  
SCO6278 (-4.06) – integral membrane transport protein  
[SCO6728](#) (2.14) - putative membrane protein  
SCO7536 (-2.33) – possible integral membrane protein

### **TRANSPOSASES AND OTHER MOBILE ELEMENTS**

SCO3113 (-3.76) – transposase remnant

[SCO4698 \(11.32\)](#) - putative insertion element IS1652 transposase

[SCO5339 \(2.93\)](#) - plasmid transfer protein

[SCO6015 \(2.01\)](#) – prophage gene

[SCO6396 \(-3.23\)](#) - probable transposase for IS1648

### **GLYCEROL UTILIZATION AND METABOLISM**

[SCO1659 \(-2.63\)](#) - *glpF*, probable glycerol uptake facilitator protein

[SCO1660 \(-2.67\)](#) – glycerol kinase

### **LIPID METABOLISM**

[SCO1565 \(2.15\)](#) - putative glycerophosphoryl diester phosphodiesterase

[SCO1661 \(-2.20\)](#) - probable glycerol-3-phosphate dehydrogenase

### **RIBOSOMAL RNAs**

[rrnA1 \(-1.01\)](#)                      [rrnD1 \(-1.14\)](#)

[rrnA2 \(1.33\)](#)                        [rrnD2 \(-1.38\)](#)

[rrnA3 \(8.41\)](#)                        [rrnD3 \(-1.04\)](#)

[rrnB1 \(4.36\)](#)                        [rrnE1 \(-1.38\)](#)

[rrnB2 \(-1.69\)](#)                        [rrnE2 \(-1.27\)](#)

[rrnB3 \(-1.49\)](#)                        [rrnE3 \(-1.02\)](#)

[rrnC1 \(2.33\)](#)                        [rrnF1 \(-1.52\)](#)

[rrnC2 \(-1.69\)](#)                        [rrnF2 \(-2.04\)](#)

[rrnC3 \(-1.35\)](#)                        [rrnF3 \(-1.69\)](#)

### **RIBOSOMAL PROTEINS**

[SCO1150 \(2.03\)](#) – *rpmE*, ribosomal protein L31

[SCO5595 \(2.23\)](#) - 50S ribosomal protein L19

### **tRNAs**

[SCOt23 \(-2.35\)](#) - tRNA<sub>leu</sub> (TAG)

[SCOt39 \(-2.25\)](#) – tRNA<sub>gly</sub> (GCC)

[SCOt12 \(2.00\)](#) – tRNA<sub>asn</sub> (GTT)

[SCOt13 \(3.31\)](#) – tRNA<sub>asn</sub> (GTT)

[SCOt17 \(2.10\)](#) – tRNA<sub>gly</sub> (TCC)

[SCOt26 \(3.63\)](#) – tRNA<sub>ala</sub> (CGC)

[SCOt36 \(2.10\)](#) – tRNA<sub>arg</sub> (ACG)

[SCOt37 \(3.40\)](#) – tRNA<sub>ser</sub> (CGA)

[SCOt55 \(2.17\)](#) – tRNA<sub>arg</sub> (CCG)

[SCOt62 \(4.71\)](#) - tRNA<sub>leu</sub> (GAG)

### **OTHER MISCELLANEOUS PROTEINS**

[SCO0494 \(-2.14\)](#) - probable iron-siderophore binding lipoprotein

[SCO1906 \(2.44\)](#) - putative twin-arginine pathway signal protein

[SCO3132 \(2.26\)](#) - putative trans-aconitate methyltransferase

[SCO3236 \(-3.02\)](#) – possible antibiotic oxygenase

SCO3244 (-4.19) - putative secreted protein  
[SCO3783](#) (2.16) - putative lipoprotein  
[SCO4095](#) (2.00) - possible lipoprotein  
[SCO4145](#) (2.34) - polyphosphate kinase  
[SCO5142](#) (2.06) - possible secreted protein  
[SCO5347](#) (3.54) - replication initiation protein  
[SCO5353](#) (3.26) - diaminopimelate decarboxylase  
[SCO5464](#) (2.07) - possible calcium-binding protein  
[SCO5520](#) (2.46) - delta-1-pyrroline-5-carboxylate dehydrogenase  
[SCO6009](#) (2.44) - solute-binding protein  
[SCO6276](#) (-4.89) – epoxide hydrolase  
[SCO6277](#) (-4.95) – putative secreted protein  
[SCO6279](#) (-2.13) - probable diaminobutyrate-pyruvate aminotransferase  
[SCO6282](#) (-15.73) - probable 3-oxoacyl-[acyl-carrier protein] reductase  
[SCO6284](#) (-2.39) – putative decarboxylase  
[SCO7391](#) (2.08) - possible phytoene dehydrogenase, pseudogene

### **HYPOTHETICAL PROTEINS**

[SCO0074](#) (2.30)  
[SCO0169](#) (2.00) – possible regulator (?)  
[SCO0198](#) (2.76)  
[SCO0200](#) (3.74) – universal stress protein family  
[SCO0209](#) (2.01) – urease  $\beta$  subunit  
[SCO0268](#) (3.27)  
[SCO0499](#) (-2.14) – formyltransferase (?)  
[SCO0500](#) (2.82) – formyltransferase (?)  
[SCO0536](#) (2.23)  
[SCO0955](#) (2.06)  
[SCO1374](#) (3.42)  
[SCO1628](#) (-2.19) – ATP/GTP binding protein (?)  
[SCO2072](#) (2.11)  
[SCO3003](#) (2.18)  
[SCO3141](#) (2.13)  
[SCO3142](#) (2.23)  
[SCO3152](#) (2.73)  
[SCO4144](#) (2.06) – contains TTA, high G+C content  
[SCO4227](#) (2.33)  
[SCO4249](#) (2.40)  
[SCO4748](#) (2.34)  
[SCO4879](#) (3.66)  
[SCO4882](#) (3.05)  
[SCO4925](#) (2.11)  
[SCO5145](#) (2.08)  
[SCO5163](#) (3.35)  
[SCO5189](#) (2.96)  
[SCO5191](#) (2.69)  
[SCO5340](#) (4.94)  
[SCO5345](#) (3.52)

SCO5346 (3.54)  
SCO5519 (2.38) – delta-1-pyrroline-5-carboxylate dehydrogenase (?)  
SCO5521 (2.81)  
SCO5536 (3.43)  
SCO5606 (5.16) – possible prophage, low G+C content (?)  
SCO5608 (2.74) – possible transcriptional regulator  
SCO5757 (2.61)  
SCO6283 (-2.56)  
SCO6317 (2.09)  
SCO6682 (-3.80)  
SCO6716 (-3.23) – acyl-[acyl carrier protein] desaturase (?)  
SCO7348 (-2.42)  
SCO7658 (-2.14) – oxidoreductase (?)

**TABLE S3**

**Genes whose transcript levels changed by  $\geq$  two-fold in the mRNA pool from JSE1880 as compared with M145 and whose enrichment ratio in the BARD was  $\geq$  1.0**

| <b>GENE ID NUMBER</b> | <b>FUNCTION</b>                                 | <b>FOLD INCREASE IN JSE1880</b> | <b>ENRICHMENT RATIO</b> |
|-----------------------|-------------------------------------------------|---------------------------------|-------------------------|
| SCO0168               | possible transcriptional regulator              | 2.41                            | 100                     |
| SCO0198               | hypothetical protein                            | 2.70                            | 47.6                    |
| SCO0200               | universal stress protein family                 | 3.74                            | 24.3                    |
| SCO0209               | urease $\beta$ subunit                          | 2.01                            | 33.8                    |
| SCO0216               | nitrate reductase alpha chain NarG2             | 2.45                            | 13.8                    |
| SCO0217               | possible nitrate reductase $\beta$ chain        | 2.02                            | 8.4                     |
| SCO0218               | putative nitrate reductase $\delta$ chain NarJ2 | 2.41                            | 5.2                     |
| SCO0219               | putative nitrate reductase $\delta$ chain NarJ2 | 2.18                            | 30                      |
| SCO0494               | probable iron-siderophore binding lipoprotein   | -2.14                           | 19                      |
| SCO0499               | formyltransferase                               | 2.10                            | 24.4                    |
| SCO0772               | regulatory protein                              | 2.46                            | 3.0                     |
| SCO0773               | ferredoxin                                      | 2.6                             | 5.4                     |
| SCO0863               | putative integral membrane protein              | 2.21                            | 18.4                    |
| SCO0924               | cytochrome B subunit                            | 2.61                            | 7.2                     |
| SCO1626               | cytochrome P450                                 | -2.60                           | 22.8                    |
| SCO2198               | glutamine synthetase I                          | 2.09                            | 12.4                    |
| SCO3982               | hypothetical protein, contains TTA codon        | 2.31                            | 1.4                     |
| SCO3983               | hypothetical protein, contains TTA codon        | 2.14                            | 1.5                     |
| SCO3985               | hypothetical protein                            | 2.61                            | 13.7                    |
| SCO4140               | phosphate ABC transporter permease              | 2.39                            | 2.1                     |
| SCO4225               | putative integral membrane protein              | 2.04                            | 1.3                     |
| SCO4227               | hypothetical protein                            | 2.33                            | 1.3                     |
| SCO4878               | glycosyltransferase                             | 2.00                            | 1.6                     |
| SCO4882               | hypothetical protein                            | 3.05                            | 4.8                     |
| SCO5112               | ABC transporter integral membrane protein BldKA | 2.56                            | 1.4                     |
| SCO5142               | hypothetical protein                            | 2.06                            | 20.5                    |
| SCO5520               | delta-1-pyrroline-5-carboxylate dehydrogenase   | 2.46                            | 2.1                     |
| SCO5608               | possible transcriptional regulator              | 2.74                            | 4.2                     |
